# Supplementary material for: The metal cofactor zinc and interacting membranes modulate SOD1 conformation-aggregation landscape in an in vitro ALS model
Source: eLife. 2021 Apr 7;10:e61453. doi: 10.7554/eLife.61453 (PMC8087447; doi:10.7554/eLife.61453)
Supplement: Figure 2—source data 1. [file elife-61453-fig2-data1.xlsx]

## Sheet: Sheet1
						Source data of Figure 2a					WT(1)	WT(2)	WT(3)	H72F(1)	H72F(2)	H72F(3)	H121F(1)	H121F(2)	H121F(3)	apo(1)	apo(2)	apo(3)
						Tryptophan Fluorescence of SOD1 variants					832813	852813	822813	628692	646197	616614	610381	628381	601010	525030	507821	531803
											850558	870558	840558	652222	669727	649672	633714	657486	648155	549326	537500	556284
											864804	884804	854804	680768	692349	681393	657936	684371	675095	577266	565368	578360
											878300	898300	868300	705679	729275	706475	678317	696317	689959	602396	590573	600655
											892546	912546	885574	730017	753661	734016	700057	726557	720150	629836	618032	633879
											905792	925792	901831	754512	778046	758360	719070	742732	736407	654284	645081	658360
											919788	939788	912746	781288	804754	781967	742803	769398	763114	679412	670286	683497
											934034	954034	924034	801342	818847	805327	762139	785792	779371	703036	693852	709945
											946030	966030	936030	822611	840116	826475	780795	807213	803989	728236	716393	732240
											956277	976277	946277	839965	857470	850327	797007	826448	811045	748574	739344	752568
											965274	985274	955274	857990	875495	868278	815504	844808	829405	769294	760040	767650
											970523	996612	960523	872107	895560	882295	832350	861639	846236	787750	778483	791693
											975771	995771	965771	886747	913210	900245	844588	876721	861318	805344	796106	812240
											979770	1005900	969770	903076	920581	913278	856303	885683	870280	823120	816598	827103
											979770	999770	969770	916400	933905	920409	863403	892677	877274	835850	829303	845464
											982769	1008920	972769	927264	944769	931229	875527	904918	889515	851942	845286	861639
											982019	1002020	972019	936075	953580	936885	877665	904262	888859	863084	856557	878487
											983019	1003020	973019	943637	961142	944262	886971	916284	900881	873850	864549	883497
											981020	1001020	971020	948652	966157	949426	890095	916721	901318	879748	870491	886557
											975271	995271	965271	951014	968519	948442	889983	916502	901099	886210	879713	895956
											974022	994022	964022	950515	974057	954344	898257	924808	909405	894066	887500	903825
											968238	988238	967322	956789	983346	951147	897371	921092	905689	903310	894057	910163
											963462	983462	959426	953177	979631	950655	897351	921092	905689	902912	893647	909726
											961659	981659	957800	953708	977308	951147	891853	915628	900225	908484	899180	918251
											956352	976352	952459	948747	969180	946229	892522	907759	892356	906834	900204	916502
											949984	969984	945956	946624	964129	940819	890595	914316	898913	906436	899795	913224
											949929	969929	942937	943530	961035	941065	881203	904918	889515	908296	899180	918032
											940538	960538	936667	937324	960819	934918	880728	904480	889077	903718	899795	910601
											934181	954181	930164	933133	956639	930737	874218	897923	882520	906684	900204	916502
											930417	950417	923429	927787	951297	922131	866993	890710	875307	903864	897336	913661
											925741	945741	915741	921939	945491	919426	862415	886120	870717	901490	894877	911256
											918735	938735	908735	911969	935505	906393	855921	879562	864159	897792	888524	904699
											911987	931987	901987	904251	927841	901721	851796	875409	860006	891630	882377	898579
											904710	924710	894710	899176	916681	893606	847842	865792	850389	883708	874590	887650
											894474	914474	884474	889243	906748	883524	832268	855956	840553	873976	864754	889379
											888882	908882	878882	881298	898803	878852	823867	847650	832247	871644	862500	887047
											878560	898560	868560	868925	886430	856847	814545	838251	822848	863406	854098	876065
											872539	892539	862539	855637	873142	853032	798342	822076	806673	852608	843442	862295
											858280	878280	848280	844357	855846	838770	788180	811803	796400	839026	829713	845901
											851276	871276	841276	827326	838893	821557	774015	797595	782192	830080	820901	836939
											834340	860286	833319	812319	823797	806557	764526	788196	772793	815392	806147	822295
											826023	846023	822172	793948	805450	788360	748851	772459	757056	802248	793032	809180
											812405	832405	811489	778820	790355	766742	726085	749726	734323	787224	778073	791256
											802794	822794	792794	766916	784421	754838	716045	739672	724269	770062	760860	777049
											786079	806079	776079	747742	765247	735664	701252	725027	709624	755186	745901	761967
											771974	791974	761974	727611	745116	715533	681854	705573	693210	739118	729918	743169
											757420	777420	747420	708362	725867	696284	664316	688087	675792	721678	712500	728524
											742918	762918	732918	690333	707838	678255	649444	670382	657909	705798	696516	712568
											732285	746256	722285	671968	689473	659890	633331	657049	644672	686672	677459	696393
											715222	735222	705222	654875	672380	642797	618446	642185	632827	671146	661885	680874
											698748	718748	688748	636506	654011	624428	600575	624262	614945	651256	642008	660983
											680182	691216	670182	617384	634889	605306	589223	610054	591721	638132	628893	647868
											655527	675527	645527	602269	619774	590191	567289	591038	569658	618640	606762	628415
											631255	651255	621255	584963	593415	572885	549639	570491	548989	605242	596106	617704
											607747	627747	597747	564712	582217	552634	531751	555409	533893	588332	579098	595191
											584048	607145	574048	550730	568235	538652	519930	540765	516243	571424	562295	578360
											563407	583407	553407	532939	550444	524016	504167	525027	503702	555394	532786	565027
											543340	563340	533340	516438	533943	510737	487658	508415	483961	540534	515368	550163
											528050	548050	518050	501533	519038	495737	473660	497267	469795	523188	500614	532896
											516392	536392	497267	484783	502288	479016	460930	478907	454467	508364	485860	518032
											495177	515177	476133	468889	486394	463278	445673	469289	444945	492044	469467	501857
											472243	492243	468237	450271	467776	444590	435028	458797	434262	481036	461065	490710
											460394	480394	456393	438212	455717	432540	420554	441311	416844	463876	438729	473661
											448162	468162	444084	424206	441711	418524	407651	428415	404071	450054	424795	459672
											440517	460517	433633	409936	427441	404262	394715	415519	391065	432846	407581	442622
											428668	442718	418668	398702	416207	392950	381950	402841	378292	424094	398975	433879
											415671	435671	405671	384608	402113	378934	368062	388852	367377	409532	384426	416393
											403057	423057	393057	370474	387979	364672	357869	378797	351352	397780	375204	407431
											386430	412527	376430	360068	377573	354344	346502	358907	337418	386570	363934	396284
											375918	395918	365918	350055	367560	344262	337240	352349	333934	376096	353483	382950
											363113	383113	353113	334443	357923	328770	327778	340109	318606	364414	341803	374207
											357953	377953	341898	324516	345150	318934	316531	328743	307226	356326	333811	366120
											346486	372581	330519	312497	336092	306885	307047	319344	297937	345562	322950	355191
											335210	361202	319139	306164	326803	300491	298383	310601	289112	332614	310040	342295
											332534	352534	313565	297031	314536	291393	289517	301857	280519	322762	300204	332459
											321449	341449	302418	289009	306514	283278	284176	296393	274945	317424	294877	327213
											313231	333231	294289	278755	296260	272950	272971	288087	266584	308966	281147	315846
											305586	325586	286625	272841	290346	263852	268041	283278	261939	298066	270286	307759
											293928	313928	283838	263414	280919	251336	260343	275409	254043	291218	265983	300983
											290105	316147	283142	256664	274169	251065	253638	268852	250327	284152	259016	302295
											287621	307621	280587	249142	266647	237064	249136	267103	251700	279078	256557	300109

## Sheet: Sheet2
wavenumber	WT	apo
1701.12	1.00013	0.98069
1699.19	1.00014	0.98076		FTIR for secondary structures of SOD1 variants
1697.26	1.00019	0.98085		Source data of Figure 2b,c
1695.33	1.00022	0.98099
1693.4	1.00028	0.98115
1691.47	1.00033	0.98132
1689.54	1.00039	0.9815
1687.61	1.00045	0.98168
1685.69	1.0005	0.98188
1683.76	1.00055	0.98209
1681.83	1.00058	0.98231
1679.9	1.00062	0.98256
1677.97	1.00065	0.98286
1676.04	1.00069	0.98321
1674.11	1.00072	0.98357
1672.18	1.00076	0.98397
1670.26	1.00082	0.98436
1668.33	1.00087	0.9847
1666.4	1.00096	0.98511
1664.47	1.00106	0.98559
1662.54	1.00118	0.98609
1660.61	1.00131	0.98656
1658.68	1.00145	0.98705
1656.75	1.00159	0.98757
1654.83	1.00174	0.98807
1652.9	1.00185	0.98856
1650.97	1.00193	0.98902
1649.04	1.00202	0.98938
1647.11	1.00208	0.98959
1645.18	1.00209	0.98967
1643.25	1.00209	0.98963
1641.33	1.00207	0.98945
1639.4	1.00202	0.9891
1637.47	1.00195	0.98852
1635.54	1.00186	0.98774
1633.61	1.00176	0.98671
1631.68	1.00166	0.98546
1629.75	1.00155	0.98405
1627.82	1.00144	0.98254
1625.9	1.00134	0.981
1623.97	1.00123	0.97946
1622.04	1.00112	0.97799
1620.11	1.001	0.97658
1618.18	1.00089	0.97518
1616.25	1.00078	0.97385
1614.32	1.00068	0.97267
1612.39	1.00059	0.97169
1610.47	1.0005	0.97093
1608.54	1.00043	0.97034
1606.61	1.00036	0.96989
1604.68	1.00031	0.96953
1602.75	1.00027	0.96929
1600.82	1.00024	0.96922
--	--	--
--	--	--
--	--	--

## Sheet: Sheet3
	beta sheet	alpha helix	D+T/L
WT	38±1.9	10±0.5	52±2.6
APO	31±1.55	16±0.8	53±2.65		Structural percentages of SOD1 variants
H72F	32±1.6	13±0.65	55±2.75		Source data of Figure 2d
H121F	37±1.71	10±0.5	55±2.65

## Sheet: Sheet4
					Source data of Figure 2g,h
	FCS correlation functions									Residual distributions
									Time(ms)	apo	apo-dppc (100 nM)	apo-dppc (500 nM)
Time(ms)	apo	apo-dppc (100 nM)	apo-dppc (500 nM)						1e-06	-0.30858	-0.21487	0.18072
1e-06	1	1	1						2e-06	0.33552	2.12758	0.22136
2e-06	0.99353	0.99419	0.99662						3e-06	-0.20193	0.04848	-0.72543
3e-06	0.98715	0.98846	0.99326						4e-06	-0.72662	-3.28548	-0.14982
4e-06	0.98084	0.98279	0.98993						5e-06	-0.71081	1.42194	0.48175						Calculation of hydrophobic radii
5e-06	0.97461	0.97719	0.98662						6e-06	0.70581	-0.29436	-0.24983						rH1	rH2
6e-06	0.96847	0.97166	0.98334						7e-06	1.18486	-0.74193	-0.05144					0	13.6±0.68
7e-06	0.96239	0.96619	0.98008						8e-06	0.10263	-0.03453	-0.31415					50	12.8±0.64	175.4±8.77
8e-06	0.95639	0.96079	0.97685						9e-06	-0.84572	-0.23008	-1.32124					100	19.5±0.975	230±11.5
9e-06	0.95047	0.95545	0.97363						1e-05	-1.14014	3.71686	0.08117					200	13.2±0.66	189±9.45
1e-05	0.94461	0.95017	0.97044						1.1e-05	0.27866	-0.28451	-3.09586					300	12.8±0.64	159±7.95
1.1e-05	0.93883	0.94496	0.96728						1.2e-05	-0.37805	-0.92911	-1.15024					400	12.97±0.65	196±9.8
1.2e-05	0.93311	0.93981	0.96413						1.3e-05	-2.01397	0.0643	-1.14697					500	14.7±0.73	128±16.4
1.3e-05	0.92746	0.93471	0.96101						1.4e-05	-0.03988	0.20354	-0.94159
1.4e-05	0.92188	0.92967	0.95791						1.5e-05	0.45199	-1.01355	0.70208
1.5e-05	0.91637	0.9247	0.95483						1.6e-05	-0.56869	-1.72376	-0.2492
1.6e-05	0.91092	0.91977	0.95177						2e-05	3.05335	-0.83609	1.04505
2e-05	0.88973	0.90062	0.93975						2.4e-05	-2.07543	-1.45038	1.32665
2.4e-05	0.86949	0.88231	0.92806						2.8e-05	1.49082	2.22959	1.02491
2.8e-05	0.85013	0.86476	0.91668						3.2e-05	-1.9867	0.55172	-0.58825
3.2e-05	0.83159	0.84794	0.90561						3.6e-05	-0.5894	2.197	1.02075
3.6e-05	0.81383	0.83181	0.89482						4e-05	-0.09166	-1.33516	0.82426
4e-05	0.7968	0.81632	0.8843						4.4e-05	-0.08509	0.10806	1.36969
4.4e-05	0.78045	0.80143	0.87406						4.8e-05	1.78995	-1.05735	0.31239
4.8e-05	0.76474	0.78711	0.86407						5.2e-05	-1.1135	-0.35597	2.40641
5.2e-05	0.74964	0.77333	0.85432						5.6e-05	1.59693	-1.16057	-0.04379
5.6e-05	0.7351	0.76006	0.84482						6e-05	1.65252	0.2211	-2.41399
6e-05	0.72111	0.74726	0.83554						6.4e-05	0.03945	-0.72173	-1.01472
6.4e-05	0.70763	0.73492	0.82648						8e-05	-0.60137	0.72534	-1.03818
8e-05	0.65828	0.68965	0.79231						9.6e-05	-0.10256	-0.03111	1.35709
9.6e-05	0.61521	0.65	0.7611						0.000112	1.39284	1.14111	1.38436
0.000112	0.57729	0.61498	0.73247						0.000128	1.81761	0.2775	0.83635
0.000128	0.54365	0.58382	0.70611						0.000144	-0.51266	-0.13214	1.30434
0.000144	0.51362	0.55592	0.68175						0.00016	-0.73792	-1.91815	1.75031
0.00016	0.48663	0.53078	0.65918						0.000176	-1.06346	-0.23098	-0.75119
0.000176	0.46225	0.50802	0.63819						0.000192	-1.1387	0.57507	-0.19441
0.000192	0.44012	0.4873	0.61863						0.000208	-0.34746	1.00374	0.18011
0.000208	0.41994	0.46836	0.60035						0.000224	0.82717	0.28587	-0.04721
0.000224	0.40146	0.45098	0.58322						0.00024	-2.12648	-0.39036	-2.25091
0.00024	0.38449	0.43498	0.56714						0.000256	0.02904	-0.04666	-0.59455
0.000256	0.36883	0.42019	0.55201						0.00032	0.53832	0.34576	0.57716
0.00032	0.31678	0.37075	0.49944						0.000384	0.61326	0.16682	-0.17831
0.000384	0.27713	0.33276	0.45682						0.000448	0.54063	0.66836	0.26137
0.000448	0.24592	0.30261	0.42149						0.000512	1.5161	0.60253	-0.45036
0.000512	0.22073	0.27806	0.39168						0.000576	-0.87095	0.59767	-0.72845
0.000576	0.19998	0.25767	0.36614						0.00064	-0.45988	0.18301	1.57129
0.00064	0.18259	0.24043	0.344						0.000704	0.49272	0.45566	-1.5463
0.000704	0.16782	0.22566	0.32459						0.000768	-0.98222	0.67443	-1.75234
0.000768	0.15512	0.21284	0.30742						0.000832	1.17933	0.49311	0.50077
0.000832	0.14408	0.2016	0.2921						0.000896	0.11948	-0.55749	-0.68995
0.000896	0.13441	0.19166	0.27834						0.00096	-1.93309	0.7766	-0.86212
0.00096	0.12586	0.1828	0.2659						0.00102	0.5373	-0.1313	-0.87166
0.00102	0.11825	0.17484	0.25459						0.00128	1.38324	-0.11216	-0.26534
0.00128	0.09473	0.14965	0.21797						0.00154	-0.01576	-0.28897	-1.10722
0.00154	0.07848	0.13156	0.19089						0.00179	0.73196	-0.28367	0.94639
0.00179	0.06661	0.11784	0.16994						0.00205	-0.00898	0.04308	0.75755
0.00205	0.05759	0.107	0.15319						0.0023	0.06967	-0.72264	-0.02103
0.0023	0.05052	0.09819	0.13946						0.00256	0.83054	-0.73536	0.1794
0.00256	0.04484	0.09085	0.12798						0.00282	-0.06613	-0.39397	1.38466
0.00282	0.04019	0.08462	0.11822						0.00307	-0.30249	0.0987	-0.82757
0.00307	0.03632	0.07926	0.10982						0.00333	-0.36738	-0.32232	-0.22878
0.00333	0.03305	0.07459	0.10251						0.00358	-0.93608	-0.48949	-0.94009
0.00358	0.03025	0.07047	0.09608						0.00384	0.35081	-0.91734	0.19422
0.00384	0.02784	0.0668	0.09038						0.0041	0.02894	-0.62571	1.30584
0.0041	0.02574	0.06352	0.0853						0.00512	-0.89749	-0.03588	1.47248
0.00512	0.01953	0.05317	0.06944						0.00614	-0.32141	-0.18181	-0.17371
0.00614	0.0155	0.04576	0.05834						0.00717	-0.27714	0.14079	0.41425
0.00717	0.0127	0.04018	0.05014						0.00819	-0.49328	0.33752	-0.73666
0.00819	0.01066	0.0358	0.04384						0.00922	-0.90248	0.58922	-0.11602
0.00922	0.00912	0.03226	0.03885						0.01024	-0.27543	0.25594	0.25633
0.01024	0.00792	0.02935	0.03481						0.01126	-0.00148	0.43272	0.52396
0.01126	0.00696	0.0269	0.03147						0.01229	-0.32018	-0.00509	-0.86312
0.01229	0.00618	0.02482	0.02867						0.01331	0.2013	0.49459	-0.08629
0.01331	0.00554	0.02302	0.02629						0.01434	-0.19545	0.431	0.21625
0.01434	0.005	0.02146	0.02424						0.01536	-0.32642	0.37497	0.13003
0.01536	0.00454	0.02008	0.02246						0.01638	-0.15305	0.43261	0.48944
0.01638	0.00415	0.01886	0.0209						0.02048	-0.21401	0.56622	0.37419
0.02048	0.00304	0.01512	0.01623						0.02458	-0.39734	0.27767	0.26088
0.02458	0.00234	0.01255	0.01313						0.02867	-0.2014	0.45703	0.19133
0.02867	0.00188	0.01068	0.01094						0.03277	-0.16719	0.18652	0.15762
0.03277	0.00155	0.00926	0.00932						0.03686	0.062	-0.08045	0.02904
0.03686	0.00131	0.00815	0.00808						0.04096	0.01932	0.27274	0.10834
0.04096	0.00112	0.00726	0.00709						0.04506	0.09957	0.11671	0.24031
0.04506	0.000978103	0.00653	0.0063						0.04915	0.00869	-0.05817	0.12818
0.04915	0.000861531	0.00592	0.00565						0.05325	0.2926	0.03795	0.03833
0.05325	0.000766413	0.0054	0.0051						0.05734	-0.00182	-0.02686	0.04141
0.05734	0.0006876	0.00496	0.00464						0.06144	0.02425	-0.11872	0.08531
0.06144	0.00062143	0.00458	0.00425

## Sheet: Sheet5
		Source data of Figure 2i,j,k
													FTIR data of apo in presense of DPPC
													Wavenumber	apo-dppc
													1701.12	1.06352
	Binding plot of SOD1 variants from FCS												1699.19	1.08528
DPPC concentration	WT		apo		H72F		H121F						1697.26	1.10028					Secondary structural percentages of the protein variants in presence of DPPC
0	0.048±0.0016		0.048±0.001		0.045±0.009		0.051±0.001						1695.33	1.13004
50	0.05±0.0016		0.29±0.007		0.33±0.008		0.05±0.002						1693.4	1.1613				beta sheet	SD(±)	alpha helix	SD(±)	D+T/L	SD(±)
100	0.11±0.0072		0.53±0.01		0.45±0.009		0.11±0.004						1691.47	1.19006			WT-DPPC	37	2.01	9	0.72	54	2.55
200	0.16±0.0064		0.77±0.017		0.76±0.016		0.16±0.006						1689.54	1.21606			APO-DPPC	24	1.89	20	0.99	56	3.12
300	0.19±0.0056		0.88±0.016		0.84±0.017		0.19±0.009						1687.61	1.24972			H72F-DPPC	27	1.67	26	0.83	47	1.98
400	0.15±0.0088		0.95±0.018		0.88±0.018		0.19±0.009						1685.69	1.29634			H121F-DPPC	35	1.65	12	0.75	53	2.15
500	0.2±0.008		0.98±0.017		0.86±0.016		0.19±0.008						1683.76	1.34885
													1681.83	1.40137
													1679.9	1.45388
													1677.97	1.50865
													1676.04	1.56317
													1674.11	1.61368
													1672.18	1.65869
													1670.26	1.69545
													1668.33	1.72046
													1666.4	1.74697
													1664.47	1.75972
													1662.54	1.76372
													1660.61	1.76422
													1658.68	1.74447
													1656.75	1.73322
													1654.83	1.70196
													1652.9	1.6767
													1650.97	1.64469
													1649.04	1.60793
													1647.11	1.57617
													1645.18	1.54116
													1643.25	1.50465
													1641.33	1.47014
													1639.4	1.44513
													1637.47	1.40737
													1635.54	1.37736
													1633.61	1.35235
													1631.68	1.33035
													1629.75	1.31334
													1627.82	1.29609
													1625.9	1.27958
													1623.97	1.26783
													1622.04	1.25708
													1620.11	1.24682
													1618.18	1.23332
													1616.25	1.21931
													1614.32	1.20256
													1612.39	1.18305
													1610.47	1.17055
													1608.54	1.1588
													1606.61	1.14804
													1604.68	1.14104
													1602.75	1.13829
													1600.82	1.14054

## Sheet: Sheet6
			Activity measurement										Source data of Figure 2-figure supplement 1,2,3
	Time (min)	WT	SD(±)	APO	SD(±)	H72F	SD(±)	H121F	SD(±)	Pyrogallol	SD(±)					Unfolding data
	0	0	0	0	0	0	0	0	0	0	0						H72F	SD(±)	H121F	SD(±)
	0.5	0.025	0.00125	0.05	0.0025	0.04347	0.00217	0.0516	0.00258	0.03697	0.00185					0	4619820	230991	4619820	230991
	1	0.05	0.0025	0.099	0.00495	0.09733	0.00487	0.10221	0.00511	0.10708	0.00535					0.4	4518820	225941	4518820	225941
	1.5	0.055	0.00275	0.125	0.00625	0.13307	0.00665	0.1347	0.00673	0.12007	0.006					0.8	4011470	200574	3735940	186797
	2	0.075	0.00375	0.155	0.00775	0.16794	0.0084	0.17443	0.00872	0.16306	0.00815					1.2	2883940	144197	2918640	145932
	2.5	0.08132	0.00407	0.19	0.0095	0.19818	0.00991	0.20955	0.01048	0.20468	0.01023					1.6	2359890	117994	2807430	140372
	3	0.09802	0.0049	0.225	0.01125	0.24291	0.01215	0.24129	0.01206	0.23317	0.01166					2	2591760	129588	2098700	104935
	3.5	0.10756	0.00538	0.257	0.01285	0.26841	0.01342	0.26678	0.01334	0.27328	0.01366					2.4	2503310	125165	2171000	108550
	4	0.125	0.00625	0.28	0.014	0.28815	0.01441	0.28815	0.01441	0.29465	0.01473					2.8	2403610	120181	2020140	101007
	4.5	0.134	0.0067	0.306	0.0153	0.31739	0.01587	0.31902	0.01595	0.30115	0.01506					3.6	2422210	121110	1968070	98403.4
	5	0.13925	0.00696	0.325	0.01625	0.33314	0.01666	0.32664	0.01633	0.33314	0.01666					4	2224710	111235	2039500	101975
																4.8	2285880	114294	2010040	100502
																5.2	2637910	131895	2213440	110672
															--	5.6	2255290	112765	1853330	92666.5
															--	6	2256180	112809	2255800	112790
															--	--	--
									Acrylamide quenching data
					acrylamide conc.	WT	SD(±)	WT-DPPC	SD(±)	Apo	SD(±)	Apo-DPPC	SD(±)	H72F	SD(±)	H72F-DPPC	SD(±)	H121F	SD(±)	H121F-DPPC	SD(±)							H121F-DPPC-CHOL
					0	1	0.05	1	0.05	1	0.05	1	0.05	1	0.05	1	0.05	1	0.05	1	0.05
					0.03627	1.243	0.06215	1.22951	0.05626	1.55198	0.0776	1.21364	0.06068	1.4957	0.07479	1.15754	0.05788	1.40361	0.07018	1.27808	0.05408
					0.0698	1.472	0.0736	1.38997	0.06242	2.10393	0.1052	1.41685	0.07084	1.95989	0.09799	1.3903	0.06952	1.55149	0.07757	1.5643	0.05709
					0.10374	1.72278	0.08614	1.58424	0.06972	2.54138	0.12707	1.7165	0.08583	2.2543	0.11271	1.60709	0.08035	1.89307	0.09465	1.73553	0.06265
					0.13608	1.89318	0.09466	1.78109	0.07527	2.88917	0.14446	1.98883	0.09944	2.73158	0.13658	1.91693	0.09585	2.09011	0.10451	1.87066	0.06767
					0.16403	2.10768	0.10538	1.96819	0.08909	3.22734	0.16137	2.23587	0.11179	3.01957	0.15098	2.14052	0.10703	2.28158	0.11408	2.07181	0.07207
					--	--	--	--	--	--	--	--	--	--	--	--	--	--	--	--	--
					--	--	--	--	--	--	--	--	--	--	--	--	--	--	--	--	--
					--	--	--	--	--	--	--	--	--	--	--	--	--	--	--	--	--
					--	--	--	--	--	--	--	--	--	--	--	--	--	--	--	--	--
					--	--	--	--	--	--	--	--	--	--	--	--	--	--	--	--	--
					--	--	--	--	--	--	--	--	--	--	--	--	--	--	--	--	--
					--	--	--	--	--	--	--	--	--	--	--	--	--	--	--	--	--
					--	--	--	--	--	--	--	--	--	--	--	--	--	--	--	--	--
					--	--	--	--	--	--	--	--	--	--	--	--	--	--	--	--	--
					--	--	--	--	--	--	--	--	--	--	--	--	--	--	--	--	--
					--	--	--	--	--	--	--	--	--	--	--	--	--	--	--	--	--
					--	--	--	--	--	--	--	--	--	--	--	--	--	--	--	--	--
					--	--	--	--	--	--	--	--	--	--	--	--	--	--	--	--	--
					--	--	--	--	--	--	--	--	--	--	--	--	--	--	--	--	--
					--	--	--	--	--	--	--	--	--	--	--	--	--	--	--	--	--
					--	--	--	--	--	--	--	--	--	--	--	--	--	--	--	--	--
					--	--	--	--	--	--	--	--	--	--	--	--	--	--	--	--	--
					--	--	--	--	--	--	--	--	--	--	--	--	--	--	--	--	--
					--	--	--	--	--	--	--	--	--	--	--	--	--	--	--	--	--
					--	--	--	--	--	--	--	--	--	--	--	--	--	--	--	--	--
					--	--	--	--	--	--	--	--	--	--	--	--	--	--	--	--	--
					--	--	--	--	--	--	--	--	--	--	--	--	--	--	--	--	--
					--	--	--	--	--	--	--	--	--	--	--	--	--	--	--	--	--
					--	--	--	--	--	--	--	--	--	--	--	--	--	--	--	--	--
					--	--	--	--	--	--	--	--	--	--	--	--	--	--	--	--	--
					--	--	--	--	--	--	--	--	--	--	--	--	--	--	--	--	--

## Sheet: Sheet7
		CD data									Binding estimated from tryptophan fluorescence measurement
	wavelength	WT	H121F	H72F	apo				DPPC concentration	apo	SD(±)	H72F	SD(±)	WT	SD(±)	H121F	SD(±)
	250	-0.9743	-1.11456	-1.49897	-1.45089				0	6935290	138706	6964030	139281	6964030	139281	6964030	139281
	249	-1.36277	-1.3711	-1.65399	-1.63875				50	7087380	141748	7364890	147298	7211900	144238	7211900	144238
	248	-1.17068	-1.51694	-1.49903	-1.52964				100	7481390	149628	7586280	151726	7098630	141973	7175140	143503
	247	-1.24038	-1.63721	-1.80898	-1.62007				200	8245950	164919	8159970	163199	7146440	142929	7378960	147579
	246	-1.66318	-1.43199	-1.57964	-1.81504				300	8533170	170663	8695430	173909	7404600	148092	7554550	151091
	245	-1.72583	-1.79911	-1.89877	-1.85554				400	8852940	177059	8757210	175144	7437700	148754	7639750	152795
	244	-1.8614	-1.89983	-2.10028	-2.14168				500	8738240	174765	8977130	179543	7609810	152196	7713890	154278
	243	-1.81813	-2.02775	-2.1374	-2.11714
	242	-1.9003	-2.2359	-2.45687	-2.5521
	241	-2.44307	-2.70534	-2.40491	-2.47629				Source data of Figure 2-figure supplement 4,7b,c
	240	-2.45479	-2.713	-2.79083	-2.8405
	239	-2.76062	-3.04255	-2.98746	-3.14033
	238	-3.18585	-3.30562	-2.94233	-3.51742
	237	-3.28476	-3.52412	-3.43149	-3.78759
	236	-3.50504	-3.77468	-3.72866	-4.13064
	235	-3.44134	-4.01765	-3.9071	-4.27725
	234	-3.91935	-4.08445	-4.48087	-4.83615
	233	-3.93396	-4.2738	-5.19672	-4.73949
	232	-3.95385	-4.50485	-5.36066	-5.65009
	231	-4.05679	-4.60871	-5.98907	-6.02495
	230	-4.18979	-4.92101	-6.59563	-6.34353
	229	-4.70278	-5.16188	-7.02186	-6.62266
	228	-5.40766	-5.64604	-7.31148	-7.25204
	227	-5.33927	-6.04396	-7.91257	-7.42893
	226	-6.03826	-6.61521	-8.30601	-8.38917
	225	-6.8649	-7.3869	-8.75956	-8.82015
	224	-7.4109	-8.31436	-9.45574	-9.59119
	223	-7.84489	-9.58877	-9.85164	-10.3739
	222	-9.23235	-10.5981	-10.827	-10.3555
	221	-10.6426	-11.3375	-11.5098	-10.563
	220	-11.5229	-13.2559	-11.9459	-11.4685
	219	-13.1887	-14.2535	-12.4738	-12.1707
	218	-14.4589	-15.6946	-13.1107	-12.0965
	217	-15.582	-17.1154	-13.8117	-12.2824
	216	-17.0899	-19.1277	-15.0554	-13.4035
	215	-17.8372	-19.388	-15.4631	-13.6004
	214	-19.5872	-20.5149	-15.8533	-14.1426
	213	-19.5918	-22.0895	-16.7606	-14.1019
	212	-20.6349	-22.565	-17.0004	-14.4842
	211	-22.7587	-23.0159	-17.3833	-15.3194
	210	-23.0175	-23.211	-17.8729	-16.4226
	209	-23.9644	-24.4791	-18.3836	-16.172
	208	-24.8852	-24.6289	-18.2918	-16.1095
	207	-24.8035	-25.5683	-18.3664	-16.6771
	206	-24.3741	-23.4855	-17.4388	-16.5349
	205	-24.8369	-22.4576	-17.0807	-15.9175
	204	-24.5708	-20.2174	-15.3062	-15.5709
	203	-21.6473	-21.903	-13.5158	-14.0262
	202	-22.3544	-19.9105	-12.2197	-12.6974
	201	-20.7749	-18.4766	-11.2929	-11.2054
	200	-19.3156	-15.1925	-9.2764	-10.7961
	--	--	--	--	--
	--	--	--	--	--
	--	--	--	--	--
	--	--	--	--	--
	--	--	--	--	--
	--	--	--	--	--
	--	--	--	--	--
	--	--	--	--	--
	--	--	--	--	--
	--	--	--	--	--
	--	--	--	--	--
	--	--	--	--	--
	--	--	--	--	--
	--	--	--	--	--
	--	--	--	--	--
	--	--	--	--	--
	--	--	--	--	--
	--	--	--	--	--
	--	--	--	--	--
	--	--
	--	--	--	--	--
	--	--	--	--	--
	--	--	--	--	--
	--	--	--	--	--
	--	--	--	--	--
	--	--	--	--	--
	--	--	--	--	--
	--	--	--	--	--
	--	--	--	--	--
	--	--	--	--	--
	--	--	--	--	--
	--	--	--	--	--
	--	--	--	--	--
	--	--	--	--	--
	--	--	--	--	--
	--	--	--	--	--
	--	--	--	--	--
	--	--	--	--	--
	--	--	--	--	--
	--	--	--	--	--
	--	--	10	10	--

## Sheet: Sheet8
	FTIR of SOD1 variants
wavenumber	H121F	H72F		APO-DPPC	WT-DPPC	H121F-DPPC	H72F-DPPC		Source data of Figure 2-figure supplement 7
1701.12	0.99992	1.00001		1.057	1.00001	0.99986	0.98069
1699.19	0.99996	1.00008		1.07231	1.00008	0.99989	0.98076
1697.26	1	1.00016		1.09063	1.00016	0.99992	0.98085
1695.33	1.00005	1.00021		1.11382	1.00021	0.99996	0.98099
1693.4	1.0001	1.00024		1.14181	1.00024	1	0.98115
1691.47	1.00015	1.00028		1.17392	1.00028	1.00004	0.98132
1689.54	1.00021	1.00031		1.20966	1.00031	1.00009	0.9815
1687.61	1.00028	1.00035		1.24972	1.00035	1.00015	0.98168
1685.69	1.00036	1.0004		1.29316	1.0004	1.00022	0.98188
1683.76	1.00044	1.00049		1.33897	1.00049	1.0003	0.98209
1681.83	1.00053	1.00061		1.38829	1.00061	1.00037	0.98231
1679.9	1.00061	1.00074		1.44082	1.00074	1.00047	0.98256
1677.97	1.0007	1.00086		1.49566	1.00086	1.00056	0.98286
1676.04	1.00079	1.00097		1.55005	1.00097	1.00066	0.98321
1674.11	1.00087	1.00107		1.60072	1.00107	1.00074	0.98357
1672.18	1.00095	1.00118		1.64563	1.00118	1.00083	0.98397
1670.26	1.00103	1.00128		1.6824	1.00128	1.00092	0.98436
1668.33	1.00109	1.00137		1.71072	1.00137	1.001	0.9847
1666.4	1.00116	1.00147		1.734	1.00147	1.00104	0.98511
1664.47	1.00122	1.00157		1.75006	1.00157	1.00108	0.98559
1662.54	1.00129	1.00168		1.75716	1.00168	1.00113	0.98609
1660.61	1.00136	1.00181		1.75457	1.00181	1.00117	0.98656
1658.68	1.00143	1.00194		1.74131	1.00194	1.00121	0.98705
1656.75	1.00151	1.00208		1.7201	1.00208	1.00129	0.98757
1654.83	1.00158	1.00221		1.69222	1.00221	1.00139	0.98807
1652.9	1.00166	1.00235		1.66036	1.00235	1.00154	0.98856
1650.97	1.00173	1.00248		1.62843	1.00248	1.00169	0.98902
1649.04	1.0018	1.00259		1.59505	1.00259	1.00181	0.98938
1647.11	1.00186	1.00268		1.55989	1.00268	1.00191	0.98959
1645.18	1.00192	1.00274		1.52495	1.00274	1.00198	0.98967
1643.25	1.00195	1.00277		1.49158	1.00277	1.00203	0.98963
1641.33	1.00197	1.00276		1.46039	1.00276	1.00208	0.98945
1639.4	1.00197	1.00272		1.43215	1.00272	1.0021	0.9891
1637.47	1.00194	1.00265		1.4074	1.00265	1.00207	0.98852
1635.54	1.0019	1.00259		1.38393	1.00259	1.002	0.98774
1633.61	1.00184	1.00252		1.36203	1.00252	1.00192	0.98671
1631.68	1.00178	1.00244		1.34344	1.00244	1.0018	0.98546
1629.75	1.0017	1.00235		1.3263	1.00235	1.00167	0.98405
1627.82	1.00162	1.00225		1.30904	1.00225	1.00156	0.98254
1625.9	1.00152	1.00212		1.29267	1.00212	1.00146	0.981
1623.97	1.00142	1.00198		1.27751	1.00198	1.00137	0.97946
1622.04	1.00132	1.00183		1.26347	1.00183	1.00126	0.97799
1620.11	1.00121	1.00168		1.25019	1.00168	1.00113	0.97658
1618.18	1.00111	1.00153		1.23652	1.00153	1.00098	0.97518
1616.25	1.00102	1.00139		1.22255	1.00139	1.00086	0.97385
1614.32	1.00092	1.00126		1.20903	1.00126	1.00076	0.97267
1612.39	1.00083	1.00114		1.19606	1.00114	1.00068	0.97169
1610.47	1.00075	1.00102		1.18364	1.00102	1.00061	0.97093
1608.54	1.00067	1.00093		1.17191	1.00093	1.00056	0.97034
1606.61	1.0006	1.00084		1.16094	1.00084	1.00049	0.96989
1604.68	1.00055	1.00078		1.1507	1.00078	1.00042	0.96953
1602.75	1.00052	1.00073		1.14163	1.00073	1.00036	0.96929
1600.82	1.00049	1.0007		1.13395	1.0007	1.00032	0.96922
