# Supplementary material for: The metal cofactor zinc and interacting membranes modulate SOD1 conformation-aggregation landscape in an in vitro ALS model
Source: eLife. 2021 Apr 7;10:e61453. doi: 10.7554/eLife.61453 (PMC8087447; doi:10.7554/eLife.61453)
Supplement: Figure 3—source data 1. [file elife-61453-fig3-data1.xlsx]

## Sheet: Sheet1
			ThT fluorescence of the aggregation of the SOD1 variants in presence and absence of membrane
		WT	apo	H72F	H121F	WT-DPPC	apo-DPPC	H72F-DPPC	H121F-DPPC
	12	0.48711	0.16958	0.556	0.33	0.00791	0.00281	0.000446863	7.80865e-05			Source data of Figure 3
	24	-2188	33	1217.97	2395.02	-176.496	9627.51	5098.83	-63.0191
	40	1130	4595.47	1809.36	6796.16	774.22	27106	14208	1638.5
	50	2047	7725.8	2220	7827.68	2009.75	50028.7	16909.2	5892.29
	70	671	16781.4	11100.5	16114.2	1476.23	81891.1	37295.9	13580.6
	90	1588	27961.2	18216	19930.8	1973.07	96905.4	61243.2	26385.1
	110	2047	50712	33050.9	25535.4	3208.89	112493	91893.4	30091.7
	140	2506	90567.8	61294.5	28526.8	5924.94	138223	110112	35155.9
	160	3882	115219	81818.2	26738.9	5892.84	141662	121283	45972.5
	180	8471	136431	96875.6	31621.4	6872.24	148424	139788	38297.7
	200	8012	140141	112510	39632.8	7978.8	166877	131262	44508.3
	250	7553	152358	118770	47541.1	7256.74	170143	129399	51863.6
	340	9908	151169	118911	56900.6	8309.24	179868	131262	63286.2

## Sheet: Sheet2
		Effect of curvature on binding										Source data of Figure 3-figure supplement 2
conc. DPPC	H72F- DPPC SUV	SD(±)	H72F-DPPC LUV	SD(±)		Effect of curvature on aggregation
0	0.05016	0.00095	0.03303	0.000625552
50	0.36676	0.00695	0.13074	0.00248		Time	H72F	H72F-SUV	H72F-LUV	H72F-GUV
100	0.5016	0.0095	0.26113	0.00495		12	0.556	0.000446863	17.6522	13.65
200	0.8448	0.016	0.51002	0.00966		24	1217.97	5098.83	1576.93	-338.613
300	0.924	0.0175	0.7566	0.01433		40	1809.36	14208	5657.55	1185.14
400	0.9768	0.0185	0.89095	0.01687		50	2220	16909.2	12533.1	1676.68
500	0.94839	0.01796	0.97843	0.01853		70	11100.5	37295.9	16725.5	4576.73
						90	18216	61243.2	36401.9	8902.24
						110	33050.9	91893.4	61891.7	12048.1
						140	61294.5	110112	103230	15046.4
						160	81818.2	121283	105455	28121.2
						180	96875.6	139788	120494	27826.3
						200	112510	131262	116099	36870.6
						250	118770	129399	136628	59972.7
						340	118911	131262	140262	68656.5

## Sheet: Sheet3
	Effect of lipid composition on binding and aggregation									Source data of Figure 3-figure supplement 2
	aggregation kinetics by ThT measurement								Binding based on lipid composition
	Time	apo-PC	apo-PC-PG	H72F-PC	H72F-PC-PG
	12	0.00281	0.00321	0.000446863	0.000446863				Lipid conc.	apo-DPPC SUV		apo-DPPG SUV		H72F-DPPC SUV		H72F-DPPG SUV
	24	9627.51	13851.1	5098.83	8543.69				0	0.0446	0.00223	0.0446	0.00223	0.034	0.0017	0.04602	0.0023
	40	27106	32168.3	14208	19717.6				50	0.27606	0.0138	0.44649	0.02232	0.27209	0.0136	0.32067	0.01603
	50	50028.7	74433.7	16909.2	26549				100	0.49662	0.02483	0.69711	0.03486	0.45346	0.02267	0.51418	0.02571
	70	81891.1	103754	37295.9	46248.9				200	0.72191	0.0361	0.82439	0.04122	0.72116	0.03606	0.82229	0.04111
	90	96905.4	121294	61243.2	74316				300	0.822	0.0411	0.89886	0.04494	0.80748	0.04037	0.86021	0.04301
	110	112493	135210	91893.4	118747				400	0.88767	0.04438	0.94314	0.04716	0.89786	0.04489	0.89395	0.0447
	140	138223	138252	110112	128014				500	0.91545	0.04577	0.93264	0.04663	0.9714	0.04857	0.83372	0.04169
	160	141662	166084	121283	139876
	180	148424	177864	139788	131509
	200	166877	184531	131262	149144
	250	170143	208867	129399	158305
	340	179868	204272	131262	160159
