# Supplementary material for: The metal cofactor zinc and interacting membranes modulate SOD1 conformation-aggregation landscape in an in vitro ALS model
Source: eLife. 2021 Apr 7;10:e61453. doi: 10.7554/eLife.61453 (PMC8087447; doi:10.7554/eLife.61453)
Supplement: Figure 5—source data 1. [file elife-61453-fig5-data1.xlsx]

## Sheet: Sheet1
					Source data of Figure 5							Aggregation kinetics
	Binding energy	Zn distance	Cu Distance								Time	G37R	SD(±)	I113T	SD(±)	G37R+DPPC	SD(±)	I113T+DPPC	SD(±)
	-1.6	19.6	19.3				Zn distance	Survival time			0	7015	350.75	37393	1869.65	30350	1517.5	40109	2005.45
	-1.9	17	15.7				19.6	--			24	14441	722.05	35844	1792.2	29305	1465.25	55487	2774.35
	-1.4	23.7	17.2				17	--			48	13022.9	651.145	44327.6	2216.38	20268.6	1013.43	57998.6	2899.93
	-1.2	22.2	13.6				23.7	18.7			72	17471.1	873.554	41157	2057.85	37522.5	1876.12	71963	3598.15
	-1	17.8	9.9				22.2	--			96	12371.1	618.554	48563.9	2428.19	33016.9	1650.84	60227.4	3011.37
	-2.3	7.8	10.2				17.8	9.8			110	16324.1	816.205	59118.1	2955.9	56988	2849.4	123826	6191.3
	-1.6	8.7	10.6				7.8	--			120	38262	1913.1	80440	4022	49030.3	2451.51	164548	8227.4
	-2.3	4.2	10.3				8.6	6			144	36355.4	1817.77	85892.7	4294.64	45913.3	2295.66	163432	8171.6
	-2	8.6	8.4				20.5	--			--	--	--	--	--	--	--	--	--
	-1.3	19.7	17.6				19.7	--			--	--	--	--	--	--	--	--	--
	-2.1	9	13				15	4			--	--	--	--	--	--	--	--	--
	-1.6	9.6	10.9				9	3			--	--	--	--	--	--	--	--	--
	-1.3	16.3	10.3				9.6	1.2			--	--	--	--	--	--	--	--	--
	-3.1	2.9	8.2				19.2	7.1			--	--	--	--	--	--	--	--	--
	-1.9	14.4	5.6				15.7	2.8			--	--	--	--	--	--	--	--	--
							22	--			--	--	--	--	--	--	--	--	--
							22.3	17.2			--	--	--	--	--	--	--	--	--
							20.5	14.1			--	--	--	Binding of disesae mutants	--	--	--	--	--
							12	--				lipid conc.	G37R	SD(±)	G85R	SD(±)	I113T	SD(±)
							9.8	3.2				0	0.06449	0.00117	0.0552	0.001	0.0552	0.001
							22.8	--				50	0.07973	0.00144	0.20156	0.00365	0.32821	0.00595
							16	4.7				100	0.12067	0.00219	0.32034	0.00683	0.45762	0.00829
							11.3	2.3				200	0.16119	0.00292	0.45797	0.00893	0.68712	0.01245
							14.5	--				300	0.23359	0.00423	0.5939	0.01036	0.75752	0.01372
							12	8				400	0.28582	0.00518	0.63117	0.0212	0.92696	0.01679
							12	10				500	0.29926	0.00542	0.64262	0.01296	0.93904	0.01701
							13	3.5
							18.2	12.3
							13.4	2.7
							24.4	20

## Sheet: Sheet2
	FTIR data of the disesae mutants for conformational analysis								Source data of Figure 5-figure supplement 1,2,5
	wavenumber	I113T+DPPC	I113T	G37R	G37R-DPPC				Residue number	G37R	I113T	DESTABILISATION G37R	DESTABILISATION I113T
	1701.12	1.06349	1.00004	1.00012	1.00023				1	0.003	0.006	19.6995	19.6719
	1699.19	1.07906	1.00003	1.00015	1.00025				2	0.002	0.004	42.3526	42.3795
	1697.26	1.10036	1.00007	1.00018	1.00028				3	0.002	-0.003	47.7494	47.66				cellular toxicity of disease mutants
	1695.33	1.12371	1.00011	1.00022	1.0003				4	0.002	-0.004	23.6652	23.5801					Viability
	1693.4	1.15157	1.00015	1.00023	1.00033				5	0.001	-0.003	72.9381	72.5533				Control	100±5
	1691.47	1.18393	1.00018	1.00028	1.00035				6	0	0.001	34.2072	34.1607				DPPC	88±4.4
	1689.54	1.21957	1.00022	1.0003	1.00038				7	0.004	0.002	30.0712	29.7698				I113T	53±2.6
	1687.61	1.25971	1.00026	1.00034	1.00043				8	0	0.001	21.4024	21.2284				I113T-DPPC	45± 2.3
	1685.69	1.30313	1.00032	1.00038	1.00047				9	0.014	0	21.3202	20.9891				G37R	77±3.8
	1683.76	1.35188	1.0004	1.00045	1.00052				10	0.015	-0.001	16.0512	15.7122				G37R-DPPC	68±3.4
	1681.83	1.408	1.00052	1.0005	1.00057				11	0.044	-0.002	14.6792	14.92
	1679.9	1.45388	1.00066	1.00054	1.00061				12	0.074	-0.002	9.39076	9.04104
	1677.97	1.50877	1.00079	1.00057	1.00065				13	0.103	-0.001	9.86768	9.09343
	1676.04	1.55998	1.00091	1.00061	1.00069				14	0.019	0	28.9475	25.5247
	1674.11	1.61036	1.00101	1.00066	1.00074				15	0.007	0	17.128	16.348
	1672.18	1.64563	1.00111	1.00071	1.00079				16	0.005	0	16.5142	15.7354
	1670.26	1.6824	1.00122	1.00077	1.00083				17	0.005	0	25.7759	25.1337
	1668.33	1.71072	1.00131	1.00085	1.00092				18	0.002	0	25.8379	25.6532
	1666.4	1.734	1.00141	1.00094	1.00102				19	0.001	0	40.4322	40.1653
	1664.47	1.75006	1.00151	1.00103	1.0011				20	0	0.001	26.9726	27.0744
	1662.54	1.75716	1.00162	1.00113	1.00119				21	0.001	0	27.0077	26.9305
	1660.61	1.76361	1.00174	1.00126	1.00133				22	0.001	-0.001	23.2519	23.1079
	1658.68	1.75128	1.00187	1.0014	1.00145				23	0.001	-0.002	10.5337	10.4529
	1656.75	1.73653	1.002	1.00154	1.00158				24	0.001	-0.003	12.1386	12.149
	1654.83	1.71195	1.00215	1.0017	1.00167				25	0.001	-0.003	28.0885	28.2342
	1652.9	1.68655	1.00228	1.0018	1.00179				26	0.001	-0.003	33.3282	33.5179
	1650.97	1.66443	1.00244	1.0019	1.00187				27	0.001	-0.003	18.5629	18.5524
	1649.04	1.63781	1.00261	1.00198	1.00193				28	0	-0.002	22.5475	22.5996
	1647.11	1.61241	1.00273	1.00206	1.00196				29	0	0	24.4017	24.2444
	1645.18	1.57718	1.0028	1.00208	1.002				30	0.001	0	24.6389	24.5988
	1643.25	1.54072	1.00284	1.00208	1.002				31	0	0.001	25.3031	25.4792
	1641.33	1.50304	1.00283	1.00205	1.00196				32	0.003	0	27.3628	27.3067
	1639.4	1.47477	1.00281	1.00199	1.00189				33	0.002	0	19.7786	19.6055
	1637.47	1.44364	1.00275	1.00193	1.00182				34	0.006	0	19.1275	18.6221
	1635.54	1.4166	1.00269	1.00187	1.00173				35	-0.004	0	18.6473	18.1845
	1633.61	1.38834	1.00255	1.00177	1.00166				36	-0.003	0	13.5606	12.0709
	1631.68	1.36622	1.0024	1.00169	1.00156				37	0.015	0	13.6321	12.8982
	1629.75	1.34287	1.00225	1.00158	1.00147				38	-0.006	0	41.4747	37.6105
	1627.82	1.32198	1.00216	1.00142	1.00132				39	0.021	0	30.0486	29.3861
	1625.9	1.29904	1.00204	1.00131	1.0012				40	0.029	0	15.5035	15.6184
	1623.97	1.28388	1.00192	1.00119	1.00109				41	0.014	0	25.9979	25.7408
	1622.04	1.27323	1.00178	1.00106	1.001				42	0.002	0	38.2546	36.9582
	1620.11	1.25684	1.00163	1.00096	1.00089				43	-0.002	0	28.3954	26.5788
	1618.18	1.25523	1.00148	1.00088	1.00079				44	-0.002	0	16.9403	16.8268
	1616.25	1.24408	1.00134	1.00077	1.00071				45	0	0	18.7679	18.822
	1614.32	1.22783	1.00121	1.00069	1.00064				46	0	0	16.9311	17.1554
	1612.39	1.20277	1.00109	1.0006	1.00053				47	0	0	18.2903	18.9017
	1610.47	1.19007	1.00098	1.00055	1.00045				48	0	0	21.1055	21.468
	1608.54	1.18463	1.00089	1.00047	1.0004				49	0	-0.002	29.8522	30.2323
	1606.61	1.17348	1.0008	1.00041	1.00035				50	0	-0.006	25.7983	26.6589
	1604.68	1.16327	1.00073	1.00035	1.00031				51	-0.001	-0.014	35.1415	36.0567
	1602.75	1.14794	1.00068	1.00029	1.00027				52	0	-0.023	201.805	202.988
	1600.82	1.13395	1.00064	1.00024	1.00024				53	-0.001	0	23.7543	23.9301
									54	0	-0.001	18.7199	18.8975
									55	0	0	40.1172	40.4304
									56	0	0	43.0181	43.2546
									57	0	-0.001	22.6683	23.0817
									58	0	-0.001	23.17	23.3889
									59	0	-0.003	30.9186	31.07
									60	0	-0.002	35.1367	35.2397
									61	0	-0.002	15.5285	15.5717
									62	0	-0.001	15.4576	15.6183
									63	0	-0.001	28.5203	28.9026
									64	0	0	28.7292	29.106
									65	0	0	20.8579	20.9703
									66	0	0	30.1015	30.072
									67	0	0	67.409	67.4013
									68	0	0	42.1685	42.0185
									69	0	0	30.6369	30.4361
									70	0	0	63.983	62.9942
									71	0	0	28.5111	28.3094
									72	0	0	30.0698	29.9606
									73	0	0	32.0573	32.2951
									74	0	0	51.5548	51.7207
									75	0	0	19.3976	19.8045
									76	0	0	27.1273	27.4098
									77	0	0	36.7172	37.4492
									78	0	0	42.1784	42.3417
									79	0	0	43.1704	42.9018
									80	0.001	0	44.5665	44.2764
									81	0.005	0	25.6685	25.3347
									82	0.009	0	19.1419	19.0304
									83	0.023	0	12.4302	13.0106
									84	0.045	0	7.78055	8.16674
									85	0.049	0	11.0978	11.6436
									86	0.019	0	13.1501	14.0498
									87	0.007	0	19.7571	19.8378
									88	0.003	0	30.3109	30.3979
									89	0.002	0	30.3804	30.4105
									90	0.002	0	48.1692	48.2174
									91	0.001	0	27.5354	27.5872
									92	0	0	44.0879	44.5612
									93	0	0.001	25.6877	25.7902
									94	0	0.001	60.1231	60.03
									95	0	0.002	51.7652	51.7183
									96	0	0.002	75.6771	75.8788
									97	0	0.005	55.9256	56.3723
									98	0	0.009	51.4906	51.4365
									99	0	0.012	52.418	52.0841
									100	0	0.015	27.5097	27.6031
									101	0	0.016	33.3258	33.3025
									102	0	-0.003	178.458	177.127
									103	0	-0.011	80.3136	80.1999
									104	0	0	77.4106	78.389
									105	0	0.007	43.7467	45.1706
									106	0	-0.029	61.3426	59.3899
									107	0	-0.016	43.8056	44.5162
									108	0	-0.005	35.1298	35.9152
									109	0	0.003	46.8542	47.2729
									110	0	0.001	22.6206	23.0636
									111	0	0	19.3248	19.4434
									112	0	-0.001	21.5092	21.0892
									113	-0.001	0	24.9509	24.201
									114	-0.001	0	36.0499	34.6688
									115	-0.001	0	23.3695	22.5512
									116	-0.001	0	25.6151	25.2937
									117	-0.001	0	24.8235	24.7994
									118	0	0	30.6041	31.1711
									119	0	0	24.0204	24.0315
									120	0	0	28.9316	29.2589
									121	0	0	42.1576	43.1264
									122	0	0	31.7757	32.3796
									123	0	-0.001	72.754	75.1682
									124	0	0	41.6984	42.3552
									125	0	0	42.4262	43.4692
									126	0	0	33.242	33.0424
									127	0	0	33.5926	33.7902
									128	0	0	43.3411	44.3481
									129	0	0	60.7013	61.0204
									130	0	0	50.382	50.2912
									131	0	0	20.3282	20.3185
									132	0	0	52.9041	52.735
									133	0	0	28.5237	28.2236
									134	-0.001	0	27.6768	27.3794
									135	-0.001	0	22.5175	22.1431
									136	-0.002	0	22.8267	22.4936
									137	-0.003	-0.001	33.4036	32.8569
									138	-0.002	-0.001	21.8043	21.7013
									139	-0.001	-0.003	29.9933	30.0044
									140	0	0	43.595	43.6638
									141	0	-0.016	71.7487	71.7263
									142	0	-0.006	33.1442	32.4331
									143	0	-0.056	98.4687	98.1716
									144	0.001	-0.079	130.968	130.942
									145	0.001	-0.067	44.9886	44.8636
									146	0.001	-0.194	339.855	340.137

## Sheet: Sheet3
	DPPC lipid conformational changes in presence of disease mutant aggregates
	wavenumber	DPPC(I113Tagg)	DPPC(I113Taggm)	DPPC(G37Ragg)	DPPC(G37Raggm)			Source data of Figure 5-figure supplement 6
	1431.4	--	0.99933	0.99968	0.99969
	1429.47	--	0.99934	0.99967	0.99969
	1427.54	--	0.99935	0.99968	0.99969
	1425.61	--	0.99938	0.99968	0.99969
	1423.68	--	0.99941	0.9997	0.99971
	1421.75	--	0.99945	0.99972	0.99972
	1419.82	--	0.99949	0.99974	0.99975
	1417.89	0.99957	0.99952	0.99977	0.99978
	1415.96	0.99958	0.99954	0.9998	0.99981
	1414.03	0.9996	0.99956	0.99983	0.99984
	1412.11	0.99966	0.99957	0.99987	0.99988
	1410.18	0.99972	0.99958	0.9999	0.99991
	1408.25	0.99975	0.99958	0.99992	0.99993
	1406.32	0.99981	0.99957	0.99994	0.99995
	1404.39	0.99987	0.99957	0.99996	0.99996
	1402.46	0.99991	0.99954	0.99997	0.99998
	1400.53	0.99995	0.99953	0.99998	0.99999
	1398.6	1.00001	0.99952	0.99999	1.00001
	1396.67	1.00006	0.9995	1.00001	1.00002
	1394.74	1.00012	0.9995	1.00001	1.00002
	1392.81	1.00017	0.99951	1.00001	1.00002
	1390.89	1.00021	0.99949	1.00002	1.00002
	1388.96	1.00024	0.99951	1.00001	1.00001
	1387.03	1.00028	0.99953	1.00001	1.00001
	1385.1	1.0003	0.99957	1.00001	1.00001
	1383.17	1.00031	0.99962	1.00001	1.00001
	1381.24	1.00033	0.9997	1	1
	1379.31	1.00034	0.99981	0.99998	0.99999
	1377.38	1.00035	0.9999	0.99996	0.99998
	1375.45	1.00036	1.00003	0.99995	0.99997
	1373.52	1.00037	1.00015	0.99993	0.99997
	1371.59	1.00037	1.00025	0.99991	0.99996
	1369.67	1.00037	1.00033	0.9999	0.99996
	1367.74	1.00037	1.00038	0.99989	0.99996
	1365.81	1.00037	1.00044	0.99988	0.99996
	1363.88	1.00037	1.00046	0.99987	0.99996
	1361.95	1.00037	1.00048	0.99986	0.99995
	1360.02	1.00036	1.0005	0.99985	0.99993
	1358.09	1.00035	1.0005	0.99984	0.99992
	1356.16	1.00033	1.0005	0.99984	0.9999
	1354.23	1.00032	1.0005	0.99983	0.99989
	1352.3	1.0003	1.00049	0.99982	0.99986
	1350.37	1.00029	1.00047	0.99981	0.99984
	1348.45	1.00027	1.00044	0.9998	0.99982
	1346.52	1.00026	1.00041	0.99979	0.99982
	1344.59	1.00025	1.00038	0.99978	0.99981
	1342.66	1.00023	1.00036	0.99977	0.9998
	1340.73	1.00021	1.00031	0.99977	0.9998
	1338.8	1.00019	1.00027	0.99977	0.99979
	1336.87	1.00018	1.00025	0.99977	0.99979
	1334.94	1.00017	1.0002	0.99978	0.9998
	1333.01	1.00016	1.00019	0.99978	0.99981
	1331.08	1.00015	1.00018	0.99982	0.99983
	1329.15	1.00015	1.00017	0.99985	0.99986
	1327.23	1.00015	1.00017	0.99989	0.9999
	1325.3	1.00015	1.00018	0.99991	0.99992
	1323.37	1.00015	1.00017	0.99993	0.99994
	1321.44	1.00015	1.00017	0.99995	0.99996
	1319.51	1.00015	1.00015	0.99996	0.99997
	1317.58	1.00016	1.00014	0.99997	0.99997
	1315.65	1.00019	1.00014	0.99998	0.99998
	1313.72	1.00021	1.00012	0.99998	0.99998
	1311.79	1.00024	1.00011	0.99997	0.99997
	1309.86	1.00027	1.00011	0.99995	0.99996
	1307.93	1.0003	1.0001	0.99994	0.99994
	1306	1.00033	1.00011	0.99992	0.99992
	1304.08	1.00035	1.00011	0.9999	0.99991
	1302.15	1.00036	1.00011	0.99988	0.99989
	1300.22	1.00036	1.00009	0.99986	0.99986
	1298.29	1.00033	1.00006	0.99983	0.99984
	1296.36	1.0003	1.00001	0.99981	0.99982
	1294.43	1.00026	0.99996	0.99979	0.9998
	1292.5	1.00021	0.99991	0.99977	0.99978
	1290.57	1.00015	0.99986	0.99975	0.99976
	1288.64	1.00009	0.99981	0.99973	0.99973
	1286.71	1.00005	0.99977	0.9997	0.9997
	1284.78	1.00001	0.99973	0.99967	0.99968
	1282.86	0.99997	0.9997	0.99965	0.99966
	1280.93	0.99994	0.99967	0.99963	0.99963
	1279	0.99991	0.99966	0.99961	0.99961
	1279	--	--	0.99961	0.99961
	--	--	--	--	--
	--	--	--	--	--
	--	--	--	--	--
	--	--	--	--	--
	--	--	--	--	--
	--	--	--	--	--
